# Supplementary material for: Interactions between sucrose and jasmonate signalling in the response to cold stress
Source: PubMed Central journal article supplement (PMC7178619; doi:10.1186/s12870-020-02376-6), 2020-04-22
Supplement: 12870_2020_2376_MOESM1_ESM.pdf [file 12870_2020_2376_MOESM1_ESM.pdf]

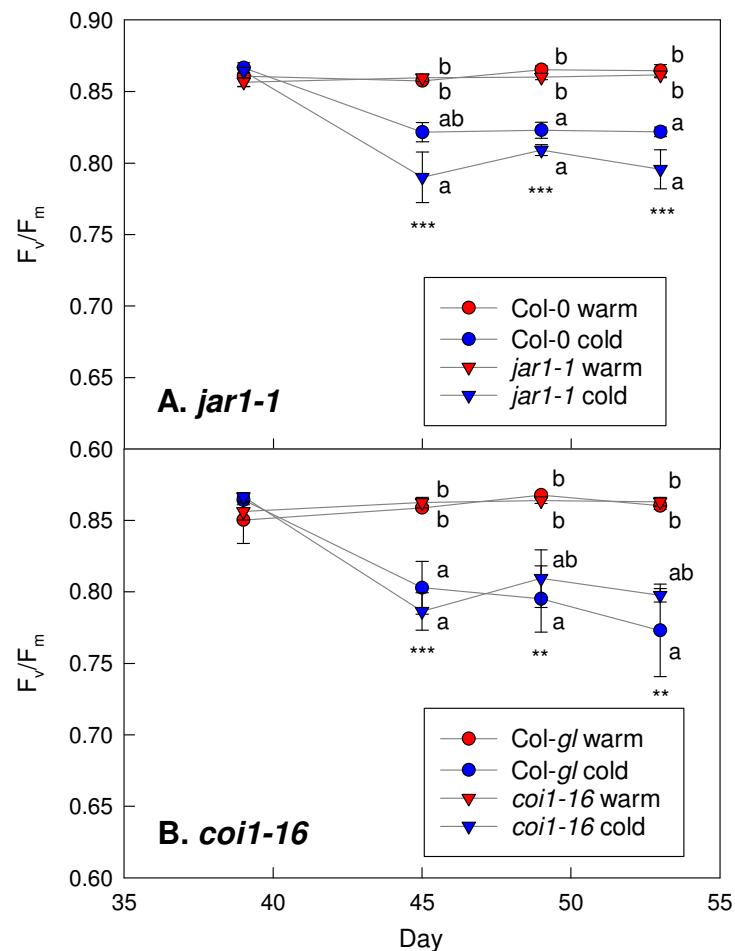

**Additional file 1.** Effect of cold treatment on  $F_v/F_m$  in individual leaves (leaf position 6) of the *jar1-1* (A) and *coi1-16* (B) mutants and their respective wild types, Col-0 and Col-*gl*. The plants were grown in compost at 20°C until day 39 and then either kept at 20°C (red symbols) or transferred to 4°C (blue symbols) for the remainder of the experiment. Data are means of 5 plants  $\pm$ SE. The asterisks indicate significant differences for each timepoint (one-way ANOVA; \*  $P < 0.05$ ; \*\*  $P < 0.01$ ; \*\*\*  $P < 0.001$ ). Different letters indicate differences between the temperature treatments or genotypes (Tukey's HSD post-hoc test;  $P < 0.05$ ).
