# Supplementary material for: Interactions between sucrose and jasmonate signalling in the response to cold stress
Source: PubMed Central journal article supplement (PMC7178619; doi:10.1186/s12870-020-02376-6), 2020-04-22
Supplement: 12870_2020_2376_MOESM8_ESM.pdf [file 12870_2020_2376_MOESM8_ESM.pdf]

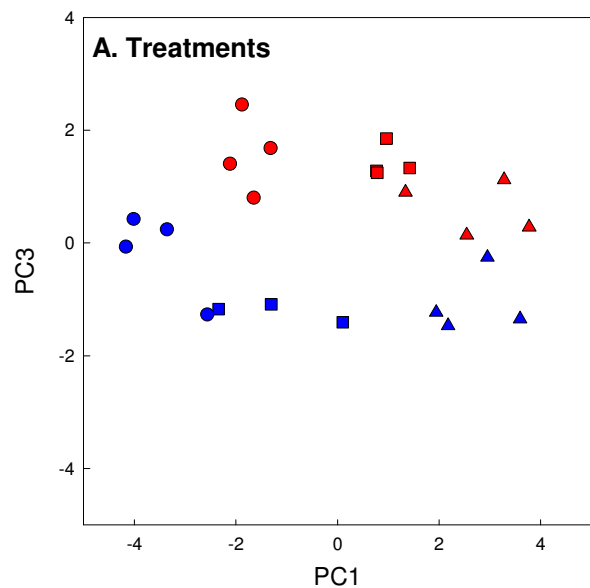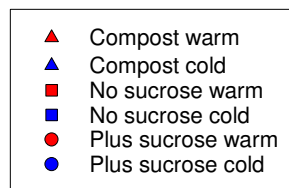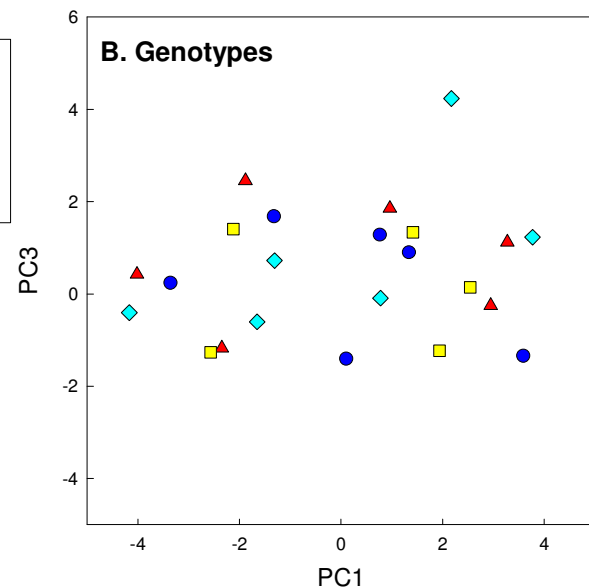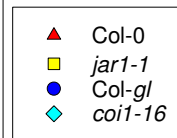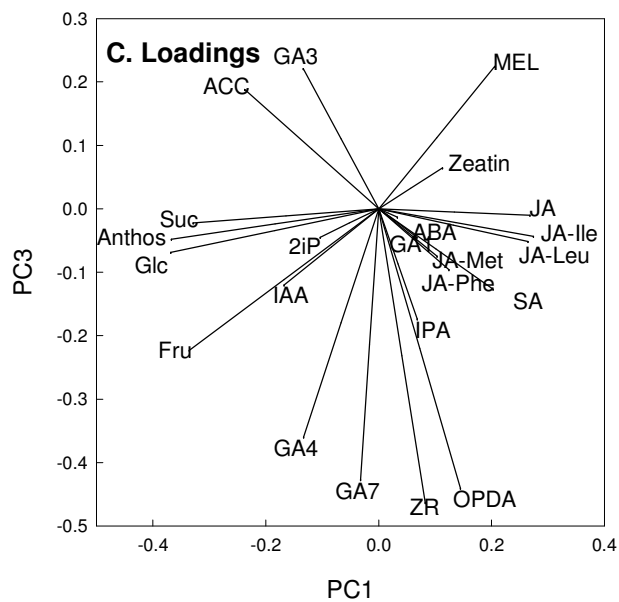

**Additional file 8.** PCA score plots (A and B) and loading plot (C) for the first and third principal components. The analysis is based on the contents of all hormones, anthocyanin, glucose, fructose and sucrose (see Supplemental Table S1). The symbols represent treatments (A) or genotypes (B).
