# Supplementary material for: Interactions between sucrose and jasmonate signalling in the response to cold stress
Source: PubMed Central journal article supplement (PMC7178619; doi:10.1186/s12870-020-02376-6), 2020-04-22
Supplement: 12870_2020_2376_MOESM9_ESM.pdf [file 12870_2020_2376_MOESM9_ESM.pdf]

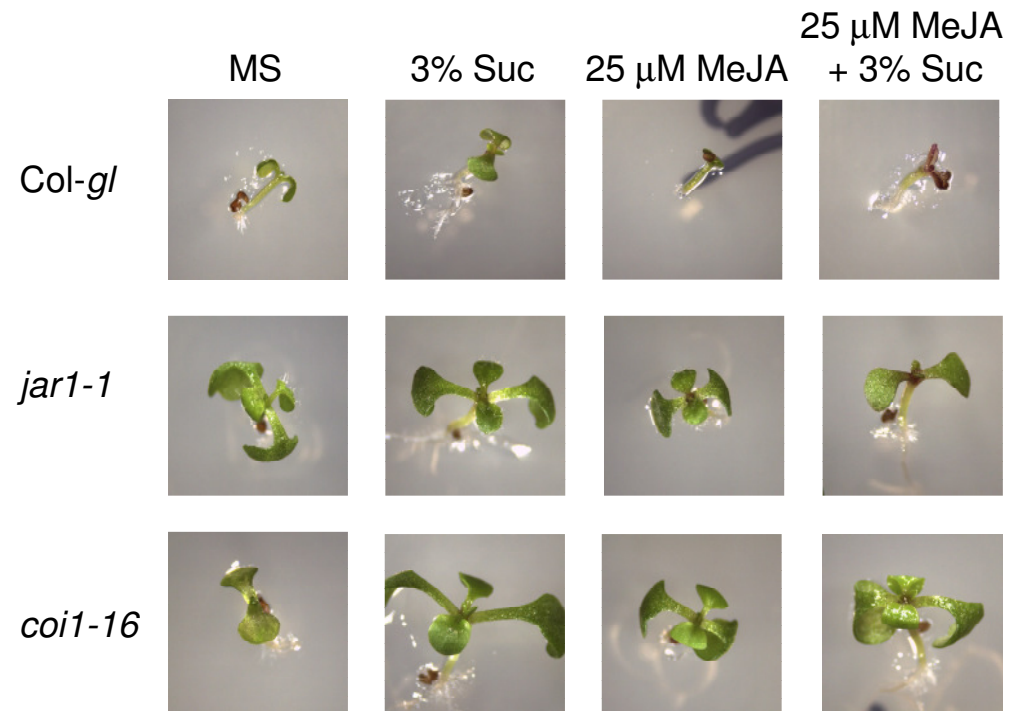

**Additional file 9.** Response of the the *jar1-1* and *coi1-16* mutants to jasmonate treatment. The plants were grown on MS medium with or without addition of 3% sucrose and/or 25  $\mu$ M methyl jasmonate.
