# Supplementary material for: Interactions between sucrose and jasmonate signalling in the response to cold stress
Source: BMC Plant Biol. 2020 Apr 22;20:176. doi: 10.1186/s12870-020-02376-6 (PMC7178619; doi:10.1186/s12870-020-02376-6)
Supplement: Supplementary file 6 — Additional file 6. Correlation between hormones, anthocyanins and sugars. [file 12870_2020_2376_MOESM6_ESM.xlsx]

## Sheet: Correlations
Additional file 6. Correlation between hormones, anthocyanins and sugars.
Numbers are Pearson correlation coefficients and P-values (in italics); significant correlations are in bold.
	JA	JA-Ile	JA-Leu	JA-Phe	JA-Met	OPDA	ABA	IAA	MEL	SA	ACC	GA1	GA3	GA4	GA7	Zeatin	ZR	IPA	2iP	Anthocyanins	Glc	Fru
JA-Ile	0.602
	0.002
JA-Leu	0.618	0.996
	0.001	0
JA-Phe	0.433	0.552	0.581
	0.035	0.005	0.003
JA-Met	0.263	0.482	0.485	-0.01
	0.214	0.017	0.016	0.963
OPDA	0.202	0.165	0.174	0.115	-0.028
	0.344	0.441	0.415	0.592	0.897
ABA	0.41	0.659	0.669	0.156	0.434	-0.051
	0.047	0	0	0.467	0.034	0.813
IAA	0.033	0.027	0.063	0.436	-0.21	-0.046	0.324
	0.879	0.9	0.769	0.033	0.324	0.832	0.123
MEL	0.104	0.318	0.308	-0.091	0.22	0.012	0.06	-0.37
	0.627	0.13	0.144	0.673	0.301	0.955	0.78	0.075
SA	0.609	0.459	0.472	0.412	0.112	0.178	0.446	0.308	0.049
	0.002	0.024	0.02	0.045	0.603	0.406	0.029	0.144	0.819
ACC	-0.345	-0.24	-0.216	-0.249	-0.219	-0.378	0.051	0.079	-0.081	-0.325
	0.099	0.259	0.312	0.241	0.304	0.069	0.814	0.714	0.706	0.121
GA1	-0.004	0.04	0.034	-0.093	0.239	0.113	-0.127	-0.104	0.049	0.006	-0.106
	0.986	0.853	0.876	0.667	0.26	0.6	0.555	0.628	0.821	0.977	0.623
GA3	-0.21	-0.219	-0.191	-0.127	-0.254	-0.244	-0.075	0.005	-0.099	-0.193	0.513	0.246
	0.324	0.303	0.372	0.553	0.231	0.25	0.727	0.982	0.646	0.366	0.01	0.246
GA4	-0.182	-0.11	-0.091	-0.044	-0.099	0.286	0.031	0.156	-0.426	-0.118	0.105	-0.366	-0.175
	0.395	0.609	0.672	0.839	0.646	0.175	0.887	0.465	0.038	0.582	0.626	0.079	0.413
GA7	-0.227	-0.126	-0.121	-0.07	-0.205	0.768	-0.121	-0.047	-0.171	-0.126	-0.002	0.088	0.004	0.401
	0.286	0.559	0.573	0.746	0.337	0	0.573	0.826	0.424	0.557	0.992	0.684	0.987	0.052
Zeatin	0.361	-0.111	-0.099	-0.235	-0.135	0.329	-0.221	-0.374	0.183	-0.084	0.027	-0.139	-0.025	-0.043	0.065
	0.083	0.605	0.646	0.269	0.53	0.116	0.299	0.072	0.393	0.695	0.902	0.516	0.908	0.842	0.763
ZR	-0.082	0.07	0.062	-0.074	0.322	0.657	-0.077	-0.182	-0.123	0.201	-0.365	0.289	-0.291	0.283	0.64	-0.158
	0.702	0.746	0.773	0.731	0.124	0	0.72	0.395	0.568	0.346	0.08	0.17	0.168	0.18	0.001	0.461
IPA	0.053	-0.291	-0.272	-0.129	-0.084	0.328	-0.339	-0.379	-0.099	0.197	-0.138	0.099	0.037	0.184	0.269	0.297	0.347
	0.806	0.168	0.199	0.547	0.697	0.118	0.105	0.068	0.646	0.357	0.519	0.644	0.863	0.388	0.204	0.158	0.097
2iP	-0.004	-0.023	-0.001	0.293	0.16	-0.089	-0.051	0.098	-0.188	-0.021	0.182	-0.141	0.044	0.014	0.043	0.017	-0.066	-0.145
	0.985	0.917	0.998	0.164	0.455	0.679	0.812	0.649	0.379	0.923	0.395	0.511	0.839	0.947	0.84	0.937	0.76	0.5
Anthocyanins	-0.388	-0.413	-0.381	-0.127	-0.088	-0.272	0.121	0.599	-0.47	-0.32	0.527	-0.105	0.194	0.323	0.04	-0.21	-0.249	-0.3	0.364
	0.061	0.045	0.066	0.554	0.684	0.199	0.575	0.002	0.02	0.127	0.008	0.627	0.363	0.124	0.852	0.325	0.241	0.155	0.08
Glc	-0.431	-0.397	-0.359	-0.125	0.023	-0.298	0.13	0.577	-0.426	-0.301	0.522	-0.046	0.191	0.319	0.042	-0.363	-0.143	-0.266	0.323	0.952
	0.036	0.055	0.085	0.559	0.915	0.157	0.544	0.003	0.038	0.153	0.009	0.832	0.37	0.128	0.844	0.081	0.505	0.209	0.124	0
Fru	-0.471	-0.391	-0.366	-0.149	0.115	-0.099	0.06	0.502	-0.486	-0.322	0.282	-0.132	-0.108	0.515	0.181	-0.329	0.095	-0.189	0.336	0.877	0.908
	0.02	0.059	0.078	0.488	0.591	0.646	0.782	0.012	0.016	0.125	0.182	0.537	0.617	0.01	0.398	0.117	0.66	0.376	0.109	0	0
Suc	-0.334	-0.327	-0.284	-0.112	0.067	-0.314	0.192	0.548	-0.43	-0.154	0.502	0.209	0.431	0.165	-0.036	-0.41	-0.123	-0.156	0.178	0.838	0.902	0.716
	0.11	0.119	0.178	0.603	0.755	0.135	0.369	0.006	0.036	0.472	0.012	0.327	0.036	0.441	0.867	0.047	0.568	0.468	0.406	0	0	0
